# Supplementary material for: Comparative Genome Analysis of Enterobacter cloacae
Source: PLoS One. 2013 Sep 12;8(9):e74487. doi: 10.1371/journal.pone.0074487 (PMC3771936; doi:10.1371/journal.pone.0074487)
Supplement: Data S2 — A Venn diagram of the data generated by EDGAR [27]. (XLSX) [file pone.0074487.s002.xlsx]

## Sheet: Sheet1
#Genomes: Enterobacter_cloacae_subsp_dissolvens_SDM_chromosome_NC_018079
A3UG_00220
A3UG_00225
A3UG_00405
A3UG_00410
A3UG_00415
A3UG_00420
A3UG_00530
A3UG_00540
A3UG_00585
A3UG_00590
A3UG_00595
A3UG_00745
A3UG_00750
A3UG_00790
A3UG_00925
A3UG_01910
A3UG_01915
A3UG_02285
A3UG_02290
A3UG_02295
A3UG_02300
A3UG_02305
A3UG_02310
A3UG_02315
A3UG_02320
A3UG_02360
A3UG_02375
A3UG_02495
A3UG_02680
A3UG_02685
A3UG_02690
A3UG_02695
A3UG_02700
A3UG_02705
A3UG_02710
A3UG_02715
A3UG_02735
A3UG_02750
A3UG_02920
A3UG_02925
A3UG_02930
A3UG_02935
A3UG_02940
A3UG_03660
A3UG_04310
A3UG_04315
A3UG_04395
A3UG_04565
A3UG_04570
A3UG_04575
A3UG_04580
A3UG_04590
A3UG_04595
A3UG_04600
A3UG_04605
A3UG_04610
A3UG_04615
A3UG_04620
A3UG_04625
A3UG_04630
A3UG_04635
A3UG_04640
A3UG_04660
A3UG_04825
A3UG_05550
A3UG_05555
A3UG_05560
A3UG_05645
A3UG_05690
A3UG_05720
A3UG_05725
A3UG_05730
A3UG_05765
A3UG_05770
A3UG_05775
A3UG_05780
A3UG_05795
A3UG_05800
A3UG_05810
A3UG_05825
A3UG_05830
A3UG_05935
A3UG_06840
A3UG_07155
A3UG_07160
A3UG_07500
A3UG_07810
A3UG_07820
A3UG_07835
A3UG_07845
A3UG_07855
A3UG_08755
A3UG_08760
A3UG_08765
A3UG_08770
A3UG_08775
A3UG_08780
A3UG_08785
A3UG_08790
A3UG_10100
A3UG_10105
A3UG_10110
A3UG_10115
A3UG_10260
A3UG_10325
A3UG_10330
A3UG_10405
A3UG_10410
A3UG_10425
A3UG_10440
A3UG_10445
A3UG_10450
A3UG_10495
A3UG_10500
A3UG_10515
A3UG_10525
A3UG_10545
A3UG_10695
A3UG_10745
A3UG_10750
A3UG_10780
A3UG_10835
A3UG_10840
A3UG_10845
A3UG_10850
A3UG_10860
A3UG_11155
A3UG_11335
A3UG_11340
A3UG_11345
A3UG_11355
A3UG_11375
A3UG_11380
A3UG_11385
A3UG_11400
A3UG_11410
A3UG_11610
A3UG_11705
A3UG_11710
A3UG_11715
A3UG_11720
A3UG_11725
A3UG_11730
A3UG_11815
A3UG_11820
A3UG_11835
A3UG_11840
A3UG_11845
A3UG_11850
A3UG_11855
A3UG_11860
A3UG_11865
A3UG_11870
A3UG_11875
A3UG_11880
A3UG_11885
A3UG_11895
A3UG_12215
A3UG_12230
A3UG_12235
A3UG_12245
A3UG_12250
A3UG_12255
A3UG_12260
A3UG_12265
A3UG_12270
A3UG_12275
A3UG_12455
A3UG_12460
A3UG_12465
A3UG_12475
A3UG_12480
A3UG_12485
A3UG_12495
A3UG_12500
A3UG_12510
A3UG_12515
A3UG_12520
A3UG_12530
A3UG_12535
A3UG_12540
A3UG_12545
A3UG_12555
A3UG_12605
A3UG_12610
A3UG_12615
A3UG_12620
A3UG_12685
A3UG_12950
A3UG_13250
A3UG_13260
A3UG_13265
A3UG_13280
A3UG_13295
A3UG_13305
A3UG_13340
A3UG_13360
A3UG_13530
A3UG_13840
A3UG_14455
A3UG_14510
A3UG_14785
A3UG_14830
A3UG_14900
A3UG_15085
A3UG_15090
A3UG_15095
A3UG_15100
A3UG_15105
A3UG_15310
A3UG_15315
A3UG_15320
A3UG_15365
A3UG_15370
A3UG_15375
A3UG_16410
A3UG_16415
A3UG_16420
A3UG_16425
A3UG_17335
A3UG_17340
A3UG_17345
A3UG_17350
A3UG_17355
A3UG_17375
A3UG_17385
A3UG_17390
A3UG_17455
A3UG_17460
A3UG_17780
A3UG_17785
A3UG_17790
A3UG_18370
A3UG_18375
A3UG_18380
A3UG_18385
A3UG_18390
A3UG_18540
A3UG_18550
A3UG_18555
A3UG_18560
A3UG_18565
A3UG_18570
A3UG_18860
A3UG_18870
A3UG_18885
A3UG_18890
A3UG_18895
A3UG_19060
A3UG_19115
A3UG_19145
A3UG_19150
A3UG_19155
A3UG_19160
A3UG_19230
A3UG_19450
A3UG_19455
A3UG_19650
A3UG_19700
A3UG_19705
A3UG_19720
A3UG_19725
A3UG_19730
A3UG_20020
A3UG_20405
A3UG_20410
A3UG_20415
A3UG_20420
A3UG_20895
A3UG_21725
A3UG_21730
A3UG_21735
A3UG_21740
A3UG_21745
A3UG_21755
A3UG_21760
A3UG_21765
A3UG_21770
A3UG_21775
A3UG_21780
A3UG_21785
A3UG_21790
A3UG_22260
#Genomes: Enterobacter_cloacae_subsp_cloacae_ENHKU01
ECENHK_00140
ECENHK_00145
ECENHK_00150
ECENHK_00155
ECENHK_00385
ECENHK_00425
ECENHK_00430
ECENHK_00550
ECENHK_00560
ECENHK_00580
ECENHK_00585
ECENHK_00590
ECENHK_01125
ECENHK_01925
ECENHK_02625
ECENHK_02630
ECENHK_02635
ECENHK_02640
ECENHK_02645
ECENHK_02650
ECENHK_02655
ECENHK_02660
ECENHK_02665
ECENHK_02670
ECENHK_02675
ECENHK_02680
ECENHK_02685
ECENHK_02690
ECENHK_02700
ECENHK_02705
ECENHK_02710
ECENHK_02730
ECENHK_02740
ECENHK_02745
ECENHK_02750
ECENHK_02755
ECENHK_02760
ECENHK_02765
ECENHK_02770
ECENHK_02775
ECENHK_02780
ECENHK_02790
ECENHK_02795
ECENHK_02820
ECENHK_02825
ECENHK_02850
ECENHK_02855
ECENHK_02870
ECENHK_02875
ECENHK_03690
ECENHK_03695
ECENHK_03700
ECENHK_03705
ECENHK_03710
ECENHK_03715
ECENHK_03720
ECENHK_04000
ECENHK_04185
ECENHK_04190
ECENHK_04195
ECENHK_04200
ECENHK_04645
ECENHK_04650
ECENHK_04655
ECENHK_04660
ECENHK_04665
ECENHK_04695
ECENHK_04700
ECENHK_04705
ECENHK_04710
ECENHK_04715
ECENHK_04720
ECENHK_04725
ECENHK_04730
ECENHK_04960
ECENHK_04965
ECENHK_05175
ECENHK_05565
ECENHK_05580
ECENHK_05680
ECENHK_05775
ECENHK_05785
ECENHK_05795
ECENHK_05800
ECENHK_05805
ECENHK_05825
ECENHK_05835
ECENHK_05870
ECENHK_05875
ECENHK_05885
ECENHK_05895
ECENHK_05900
ECENHK_05975
ECENHK_05980
ECENHK_05985
ECENHK_06230
ECENHK_06235
ECENHK_06240
ECENHK_06245
ECENHK_07935
ECENHK_07945
ECENHK_07950
ECENHK_07955
ECENHK_08220
ECENHK_08555
ECENHK_08560
ECENHK_08565
ECENHK_08570
ECENHK_08575
ECENHK_08580
ECENHK_08620
ECENHK_08825
ECENHK_09370
ECENHK_09880
ECENHK_10060
ECENHK_10070
ECENHK_10090
ECENHK_10095
ECENHK_10100
ECENHK_10115
ECENHK_10260
ECENHK_10370
ECENHK_10380
ECENHK_10385
ECENHK_10390
ECENHK_10395
ECENHK_10400
ECENHK_10405
ECENHK_10435
ECENHK_10440
ECENHK_10445
ECENHK_10725
ECENHK_10730
ECENHK_11135
ECENHK_11505
ECENHK_11510
ECENHK_11530
ECENHK_11535
ECENHK_11725
ECENHK_11795
ECENHK_11810
ECENHK_11845
ECENHK_11890
ECENHK_11910
ECENHK_11935
ECENHK_11940
ECENHK_11985
ECENHK_12465
ECENHK_12480
ECENHK_12525
ECENHK_12565
ECENHK_12640
ECENHK_12690
ECENHK_12695
ECENHK_12730
ECENHK_12735
ECENHK_12745
ECENHK_12750
ECENHK_13040
ECENHK_13045
ECENHK_13050
ECENHK_13055
ECENHK_13070
ECENHK_13130
ECENHK_13180
ECENHK_13675
ECENHK_13775
ECENHK_13780
ECENHK_13785
ECENHK_13790
ECENHK_14050
ECENHK_14235
ECENHK_14280
ECENHK_14285
ECENHK_14335
ECENHK_14340
ECENHK_14345
ECENHK_14350
ECENHK_14355
ECENHK_14360
ECENHK_14365
ECENHK_14370
ECENHK_14375
ECENHK_14380
ECENHK_14580
ECENHK_14590
ECENHK_14595
ECENHK_14600
ECENHK_14605
ECENHK_14610
ECENHK_14615
ECENHK_14620
ECENHK_14625
ECENHK_15590
ECENHK_15595
ECENHK_15600
ECENHK_15815
ECENHK_15820
ECENHK_15825
ECENHK_15830
ECENHK_15835
ECENHK_15840
ECENHK_15845
ECENHK_15850
ECENHK_15855
ECENHK_15870
ECENHK_16365
ECENHK_16920
ECENHK_17070
ECENHK_17075
ECENHK_17090
ECENHK_17120
ECENHK_17135
ECENHK_17140
ECENHK_17150
ECENHK_18160
ECENHK_18170
ECENHK_18175
ECENHK_18185
ECENHK_18190
ECENHK_18195
ECENHK_18200
ECENHK_18205
ECENHK_18210
ECENHK_18215
ECENHK_18220
ECENHK_18225
ECENHK_18230
ECENHK_18500
ECENHK_18505
ECENHK_18510
ECENHK_18520
ECENHK_18710
ECENHK_18715
ECENHK_18720
ECENHK_18765
ECENHK_18770
ECENHK_19105
ECENHK_19110
ECENHK_19120
ECENHK_19150
ECENHK_19155
ECENHK_19205
ECENHK_19445
ECENHK_20010
ECENHK_20015
ECENHK_20315
ECENHK_20320
ECENHK_20325
ECENHK_20330
ECENHK_20335
ECENHK_20340
ECENHK_20345
ECENHK_20350
ECENHK_20355
ECENHK_20360
ECENHK_20365
ECENHK_20370
ECENHK_20375
ECENHK_20380
ECENHK_20475
ECENHK_20485
ECENHK_21205
ECENHK_21210
ECENHK_21225
ECENHK_21230
ECENHK_21235
ECENHK_21240
ECENHK_21655
ECENHK_21660
ECENHK_21830
ECENHK_21875
ECENHK_21885
ECENHK_21890
ECENHK_21895
ECENHK_21900
ECENHK_22010
#Genomes: Enterobacter_cloacae_subsp_cloacae_ENHKU01,Enterobacter_cloacae_subsp_dissolvens_SDM_chromosome_NC_018079
ECENHK_00225,A3UG_22970
ECENHK_00435,A3UG_02745
ECENHK_00565,A3UG_00150
ECENHK_00575,A3UG_00520
ECENHK_00975,A3UG_01035
ECENHK_01300,A3UG_01365
ECENHK_01305,A3UG_01370
ECENHK_03165,A3UG_03070
ECENHK_03170,A3UG_03075
ECENHK_03175,A3UG_03080
ECENHK_03180,A3UG_03085
ECENHK_03190,A3UG_03095
ECENHK_04735,A3UG_05835
ECENHK_05595,A3UG_12440
ECENHK_05600,A3UG_05565
ECENHK_05790,A3UG_05805
ECENHK_05830,A3UG_05905
ECENHK_05905,A3UG_05845
ECENHK_05910,A3UG_05850
ECENHK_05940,A3UG_05880
ECENHK_05945,A3UG_05885
ECENHK_05950,A3UG_05890
ECENHK_05955,A3UG_05895
ECENHK_05960,A3UG_05900
ECENHK_06020,A3UG_05950
ECENHK_06025,A3UG_05955
ECENHK_06030,A3UG_05960
ECENHK_06035,A3UG_05965
ECENHK_06515,A3UG_06420
ECENHK_06545,A3UG_06450
ECENHK_07920,A3UG_07900
ECENHK_10375,A3UG_11360
ECENHK_11720,A3UG_10700
ECENHK_11870,A3UG_12075
ECENHK_11975,A3UG_12580
ECENHK_11980,A3UG_12585
ECENHK_11990,A3UG_12590
ECENHK_11995,A3UG_12595
ECENHK_12000,A3UG_12600
ECENHK_12020,A3UG_12640
ECENHK_12025,A3UG_12645
ECENHK_12030,A3UG_12650
ECENHK_12035,A3UG_12655
ECENHK_12040,A3UG_12660
ECENHK_12675,A3UG_19620
ECENHK_12720,A3UG_00535
ECENHK_13075,A3UG_13225
ECENHK_13090,A3UG_13240
ECENHK_13200,A3UG_13450
ECENHK_13930,A3UG_14175
ECENHK_13985,A3UG_07850
ECENHK_14400,A3UG_14925
ECENHK_14405,A3UG_14930
ECENHK_14410,A3UG_14935
ECENHK_14415,A3UG_14940
ECENHK_14420,A3UG_14945
ECENHK_14425,A3UG_14950
ECENHK_17200,A3UG_17465
ECENHK_18530,A3UG_18855
ECENHK_20060,A3UG_20625
ECENHK_20480,A3UG_02370
ECENHK_21870,A3UG_04305
#Genomes: ALL_Enterobacter_cloacae_subsp_cloacae_ATCC_13047_chromosome_NC_014121
ECL_00024
ECL_00030
ECL_00061
ECL_00067
ECL_00085
ECL_00100
ECL_00110
ECL_00114
ECL_00144
ECL_00145
ECL_00146
ECL_00148
ECL_00163
ECL_00164
ECL_00165
ECL_00167
ECL_00171
ECL_00221
ECL_00227
ECL_00230
ECL_00232
ECL_00272
ECL_00273
ECL_00284
ECL_00285
ECL_00286
ECL_00287
ECL_00291
ECL_00301
ECL_00336
ECL_00342
ECL_00347
ECL_00372
ECL_00379
ECL_00389
ECL_00390
ECL_00391
ECL_00392
ECL_00393
ECL_00396
ECL_00397
ECL_00398
ECL_00399
ECL_00400
ECL_00401
ECL_00402
ECL_00403
ECL_00404
ECL_00405
ECL_00406
ECL_00407
ECL_00408
ECL_00409
ECL_00410
ECL_00411
ECL_00412
ECL_00413
ECL_00414
ECL_00415
ECL_00416
ECL_00417
ECL_00418
ECL_00419
ECL_00420
ECL_00421
ECL_00422
ECL_00423
ECL_00424
ECL_00425
ECL_00426
ECL_00427
ECL_00428
ECL_00429
ECL_00430
ECL_00431
ECL_00432
ECL_00433
ECL_00434
ECL_00435
ECL_00436
ECL_00437
ECL_00438
ECL_00439
ECL_00440
ECL_00441
ECL_00442
ECL_00443
ECL_00444
ECL_00445
ECL_00446
ECL_00447
ECL_00448
ECL_00449
ECL_00450
ECL_00451
ECL_00452
ECL_00453
ECL_00454
ECL_00455
ECL_00456
ECL_00457
ECL_00458
ECL_00459
ECL_00460
ECL_00461
ECL_00462
ECL_00463
ECL_00464
ECL_00465
ECL_00466
ECL_00467
ECL_00468
ECL_00469
ECL_00470
ECL_00471
ECL_00472
ECL_00473
ECL_00474
ECL_00475
ECL_00476
ECL_00477
ECL_00478
ECL_00479
ECL_00480
ECL_00481
ECL_00482
ECL_00483
ECL_00484
ECL_00485
ECL_00487
ECL_00488
ECL_00489
ECL_00490
ECL_00491
ECL_00492
ECL_00493
ECL_00494
ECL_00495
ECL_00496
ECL_00497
ECL_00498
ECL_00499
ECL_00501
ECL_00502
ECL_00503
ECL_00504
ECL_00505
ECL_00506
ECL_00507
ECL_00508
ECL_00509
ECL_00510
ECL_00511
ECL_00512
ECL_00513
ECL_00514
ECL_00515
ECL_00516
ECL_00517
ECL_00518
ECL_00519
ECL_00520
ECL_00521
ECL_00522
ECL_00523
ECL_00524
ECL_00525
ECL_00527
ECL_00528
ECL_00529
ECL_00530
ECL_00531
ECL_00532
ECL_00607
ECL_00666
ECL_00682
ECL_00683
ECL_00684
ECL_00685
ECL_00687
ECL_00688
ECL_00689
ECL_00693
ECL_00698
ECL_00700
ECL_00702
ECL_00744
ECL_00771
ECL_00772
ECL_00773
ECL_00774
ECL_00813
ECL_00826
ECL_00832
ECL_00843
ECL_00877
ECL_00895
ECL_00976
ECL_00991
ECL_01015
ECL_01016
ECL_01064
ECL_01066
ECL_01072
ECL_01077
ECL_01078
ECL_01079
ECL_01080
ECL_01082
ECL_01083
ECL_01084
ECL_01085
ECL_01086
ECL_01087
ECL_01103
ECL_01104
ECL_01105
ECL_01106
ECL_01107
ECL_01108
ECL_01109
ECL_01110
ECL_01111
ECL_01112
ECL_01113
ECL_01114
ECL_01116
ECL_01117
ECL_01118
ECL_01119
ECL_01120
ECL_01121
ECL_01122
ECL_01141
ECL_01156
ECL_01190
ECL_01210
ECL_01287
ECL_01288
ECL_01289
ECL_01290
ECL_01291
ECL_01292
ECL_01293
ECL_01294
ECL_01295
ECL_01296
ECL_01299
ECL_01300
ECL_01301
ECL_01302
ECL_01304
ECL_01305
ECL_01306
ECL_01307
ECL_01308
ECL_01309
ECL_01310
ECL_01311
ECL_01312
ECL_01313
ECL_01314
ECL_01316
ECL_01317
ECL_01321
ECL_01322
ECL_01325
ECL_01326
ECL_01334
ECL_01336
ECL_01340
ECL_01347
ECL_01348
ECL_01349
ECL_01350
ECL_01351
ECL_01436
ECL_01458
ECL_01459
ECL_01460
ECL_01462
ECL_01509
ECL_01531
ECL_01561
ECL_01562
ECL_01569
ECL_01570
ECL_01573
ECL_01575
ECL_01579
ECL_01581
ECL_01585
ECL_01586
ECL_01603
ECL_01605
ECL_01657
ECL_01658
ECL_01661
ECL_01662
ECL_01663
ECL_01664
ECL_01666
ECL_01667
ECL_01668
ECL_01669
ECL_01671
ECL_01672
ECL_01673
ECL_01674
ECL_01675
ECL_01676
ECL_01677
ECL_01678
ECL_01679
ECL_01680
ECL_01681
ECL_01682
ECL_01683
ECL_01684
ECL_01686
ECL_01687
ECL_01688
ECL_01689
ECL_01695
ECL_01696
ECL_01700
ECL_01701
ECL_01702
ECL_01703
ECL_01704
ECL_01705
ECL_01706
ECL_01707
ECL_01708
ECL_01709
ECL_01710
ECL_01713
ECL_01714
ECL_01716
ECL_01718
ECL_01719
ECL_01720
ECL_01722
ECL_01723
ECL_01724
ECL_01730
ECL_01763
ECL_01764
ECL_01809
ECL_01810
ECL_01811
ECL_01812
ECL_01815
ECL_01832
ECL_01837
ECL_01849
ECL_01899
ECL_01925
ECL_01935
ECL_01963
ECL_02038
ECL_02061
ECL_02062
ECL_02063
ECL_02065
ECL_02071
ECL_02083
ECL_02084
ECL_02131
ECL_02132
ECL_02133
ECL_02134
ECL_02158
ECL_02169
ECL_02174
ECL_02175
ECL_02176
ECL_02190
ECL_02201
ECL_02202
ECL_02203
ECL_02204
ECL_02205
ECL_02206
ECL_02207
ECL_02208
ECL_02209
ECL_02224
ECL_02227
ECL_02245
ECL_02282
ECL_02283
ECL_02287
ECL_02288
ECL_02291
ECL_02292
ECL_02296
ECL_02298
ECL_02388
ECL_02413
ECL_02419
ECL_02473
ECL_02476
ECL_02477
ECL_02478
ECL_02509
ECL_02510
ECL_02551
ECL_02573
ECL_02589
ECL_02630
ECL_02671
ECL_02672
ECL_02673
ECL_02674
ECL_02708
ECL_02713
ECL_02714
ECL_02715
ECL_02716
ECL_02717
ECL_02718
ECL_02719
ECL_02720
ECL_02729
ECL_02800
ECL_02813
ECL_02826
ECL_02827
ECL_02829
ECL_02830
ECL_02835
ECL_02836
ECL_02837
ECL_02840
ECL_02841
ECL_02844
ECL_02845
ECL_02846
ECL_02847
ECL_02848
ECL_02849
ECL_02850
ECL_02851
ECL_02852
ECL_02853
ECL_02854
ECL_02855
ECL_02856
ECL_02858
ECL_02859
ECL_02860
ECL_02861
ECL_02862
ECL_02863
ECL_02865
ECL_02868
ECL_02880
ECL_02884
ECL_02917
ECL_02956
ECL_02991
ECL_03006
ECL_03073
ECL_03129
ECL_03132
ECL_03133
ECL_03135
ECL_03136
ECL_03137
ECL_03138
ECL_03142
ECL_03145
ECL_03146
ECL_03177
ECL_03180
ECL_03181
ECL_03182
ECL_03183
ECL_03184
ECL_03185
ECL_03186
ECL_03187
ECL_03188
ECL_03189
ECL_03190
ECL_03191
ECL_03193
ECL_03194
ECL_03203
ECL_03205
ECL_03206
ECL_03207
ECL_03213
ECL_03214
ECL_03215
ECL_03216
ECL_03290
ECL_03302
ECL_03303
ECL_03313
ECL_03354
ECL_03355
ECL_03356
ECL_03357
ECL_03358
ECL_03359
ECL_03360
ECL_03361
ECL_03362
ECL_03363
ECL_03364
ECL_03408
ECL_03419
ECL_03446
ECL_03456
ECL_03471
ECL_03477
ECL_03478
ECL_03479
ECL_03485
ECL_03486
ECL_03487
ECL_03488
ECL_03528
ECL_03529
ECL_03530
ECL_03541
ECL_03542
ECL_03543
ECL_03544
ECL_03545
ECL_03546
ECL_03547
ECL_03548
ECL_03549
ECL_03550
ECL_03551
ECL_03552
ECL_03553
ECL_03554
ECL_03555
ECL_03556
ECL_03557
ECL_03558
ECL_03559
ECL_03560
ECL_03561
ECL_03562
ECL_03563
ECL_03564
ECL_03566
ECL_03567
ECL_03568
ECL_03569
ECL_03570
ECL_03571
ECL_03573
ECL_03575
ECL_03576
ECL_03577
ECL_03578
ECL_03579
ECL_03582
ECL_03583
ECL_03585
ECL_03586
ECL_03588
ECL_03589
ECL_03590
ECL_03591
ECL_03592
ECL_03593
ECL_03594
ECL_03595
ECL_03596
ECL_03597
ECL_03598
ECL_03599
ECL_03600
ECL_03601
ECL_03602
ECL_03603
ECL_03604
ECL_03605
ECL_03606
ECL_03688
ECL_03689
ECL_03690
ECL_03691
ECL_03692
ECL_03693
ECL_03694
ECL_03695
ECL_03696
ECL_03697
ECL_03698
ECL_03699
ECL_03700
ECL_03701
ECL_03705
ECL_03706
ECL_03708
ECL_03709
ECL_03710
ECL_03711
ECL_03713
ECL_03716
ECL_03718
ECL_03720
ECL_03722
ECL_03797
ECL_03813
ECL_03814
ECL_03815
ECL_03816
ECL_03817
ECL_03818
ECL_03820
ECL_03821
ECL_03822
ECL_03823
ECL_03824
ECL_03825
ECL_03826
ECL_03827
ECL_03828
ECL_03829
ECL_03830
ECL_03831
ECL_03832
ECL_03833
ECL_03834
ECL_03835
ECL_03836
ECL_03837
ECL_03838
ECL_03839
ECL_03840
ECL_03841
ECL_03842
ECL_03843
ECL_03847
ECL_03852
ECL_03947
ECL_03954
ECL_03955
ECL_03956
ECL_03957
ECL_03958
ECL_03959
ECL_03960
ECL_03961
ECL_03962
ECL_03968
ECL_03969
ECL_03970
ECL_03971
ECL_03972
ECL_03973
ECL_03974
ECL_03975
ECL_03976
ECL_03977
ECL_03978
ECL_04008
ECL_04009
ECL_04051
ECL_04065
ECL_04097
ECL_04190
ECL_04193
ECL_04194
ECL_04195
ECL_04196
ECL_04198
ECL_04199
ECL_04202
ECL_04205
ECL_04206
ECL_04207
ECL_04208
ECL_04211
ECL_04212
ECL_04226
ECL_04251
ECL_04291
ECL_04305
ECL_04306
ECL_04320
ECL_04333
ECL_04337
ECL_04368
ECL_04369
ECL_04370
ECL_04371
ECL_04395
ECL_04408
ECL_04418
ECL_04431
ECL_04434
ECL_04442
ECL_04462
ECL_04463
ECL_04464
ECL_04465
ECL_04466
ECL_04467
ECL_04469
ECL_04471
ECL_04472
ECL_04473
ECL_04474
ECL_04475
ECL_04476
ECL_04516
ECL_04610
ECL_04630
ECL_04702
ECL_04704
ECL_04728
ECL_04732
ECL_04754
ECL_04767
ECL_04770
ECL_04782
ECL_04783
ECL_04788
ECL_04796
ECL_04823
ECL_04873
ECL_04874
ECL_04876
ECL_04877
ECL_04878
ECL_04879
ECL_04880
ECL_04881
ECL_04882
ECL_04883
ECL_04884
ECL_04885
ECL_04886
ECL_04887
ECL_04888
ECL_04891
ECL_04893
ECL_04896
ECL_04897
ECL_04898
ECL_04899
ECL_04900
ECL_04901
ECL_04902
ECL_04904
ECL_04905
ECL_04906
ECL_04907
ECL_04908
ECL_04909
ECL_04929
ECL_04986
ECL_05022
ECL_05056
ECL_05094
ECL_05117
ECL_05162
ECL_A002
ECL_A003
ECL_A007
ECL_A012
ECL_A013
ECL_A014
ECL_A015
ECL_A016
ECL_A017
ECL_A018
ECL_A019
ECL_A020
ECL_A021
ECL_A022
ECL_A023
ECL_A024
ECL_A025
ECL_A026
ECL_A027
ECL_A028
ECL_A029
ECL_A032
ECL_A034
ECL_A036
ECL_A037
ECL_A038
ECL_A039
ECL_A040
ECL_A041
ECL_A042
ECL_A043
ECL_A044
ECL_A045
ECL_A046
ECL_A047
ECL_A048
ECL_A049
ECL_A050
ECL_A051
ECL_A052
ECL_A053
ECL_A054
ECL_A055
ECL_A056
ECL_A057
ECL_A058
ECL_A060
ECL_A061
ECL_A062
ECL_A063
ECL_A064
ECL_A065
ECL_A068
ECL_A069
ECL_A070
ECL_A071
ECL_A072
ECL_A073
ECL_A074
ECL_A075
ECL_A076
ECL_A077
ECL_A078
ECL_A079
ECL_A080
ECL_A081
ECL_A082
ECL_A083
ECL_A084
ECL_A085
ECL_A086
ECL_A087
ECL_A088
ECL_A089
ECL_A090
ECL_A091
ECL_A092
ECL_A093
ECL_A094
ECL_A095
ECL_A101
ECL_A102
ECL_A103
ECL_A104
ECL_A105
ECL_A106
ECL_A108
ECL_A109
ECL_A110
ECL_A111
ECL_A112
ECL_A113
ECL_A114
ECL_A115
ECL_A116
ECL_A117
ECL_A118
ECL_A119
ECL_A120
ECL_A121
ECL_A122
ECL_A123
ECL_A124
ECL_A125
ECL_A126
ECL_A127
ECL_A128
ECL_A129
ECL_A130
ECL_A131
ECL_A132
ECL_A133
ECL_A134
ECL_A135
ECL_A136
ECL_A137
ECL_A138
ECL_A139
ECL_A140
ECL_A141
ECL_A142
ECL_A143
ECL_A144
ECL_A145
ECL_A146
ECL_A147
ECL_A148
ECL_A149
ECL_A150
ECL_A151
ECL_A152
ECL_A153
ECL_A154
ECL_A155
ECL_A156
ECL_A157
ECL_A158
ECL_A159
ECL_A160
ECL_A161
ECL_A162
ECL_A163
ECL_A164
ECL_A165
ECL_A166
ECL_A167
ECL_A168
ECL_A169
ECL_A170
ECL_A171
ECL_A172
ECL_A173
ECL_A174
ECL_A175
ECL_A176
ECL_A177
ECL_A178
ECL_A180
ECL_A181
ECL_A185
ECL_A188
ECL_A189
ECL_A190
ECL_A193
ECL_A194
ECL_A195
ECL_A196
ECL_A197
ECL_A198
ECL_A199
ECL_A200
ECL_A201
ECL_A202
ECL_A203
ECL_A204
ECL_A205
ECL_A206
ECL_A207
ECL_A208
ECL_A209
ECL_A210
ECL_A211
ECL_A212
ECL_A213
ECL_A214
ECL_A215
ECL_A216
ECL_A217
ECL_A218
ECL_A219
ECL_A220
ECL_A221
ECL_A222
ECL_A223
ECL_A224
ECL_A225
ECL_A227
ECL_A228
ECL_A229
ECL_A230
ECL_A231
ECL_A232
ECL_A233
ECL_A234
ECL_A235
ECL_A236
ECL_A240
ECL_A241
ECL_A242
ECL_A243
ECL_A244
ECL_A245
ECL_A246
ECL_A247
ECL_A248
ECL_A249
ECL_A250
ECL_A251
ECL_A252
ECL_A253
ECL_A254
ECL_A255
ECL_A256
ECL_A257
ECL_A258
ECL_A259
ECL_A260
ECL_A261
ECL_A263
ECL_A264
ECL_A265
ECL_A266
ECL_A267
ECL_A268
ECL_A269
ECL_A271
ECL_A272
ECL_A273
ECL_A274
ECL_A276
ECL_B001
ECL_B002
ECL_B003
ECL_B004
ECL_B006
ECL_B007
ECL_B008
ECL_B009
ECL_B010
ECL_B012
ECL_B013
ECL_B014
ECL_B015
ECL_B016
ECL_B017
ECL_B018
ECL_B019
ECL_B020
ECL_B021
ECL_B022
ECL_B023
ECL_B024
ECL_B025
ECL_B026
ECL_B027
ECL_B028
ECL_B029
ECL_B030
ECL_B031
ECL_B032
ECL_B033
ECL_B034
ECL_B035
ECL_B036
ECL_B037
ECL_B038
ECL_B039
ECL_B040
ECL_B041
ECL_B042
ECL_B043
ECL_B044
ECL_B045
ECL_B046
ECL_B047
ECL_B048
ECL_B049
ECL_B050
ECL_B051
ECL_B052
ECL_B053
ECL_B054
ECL_B055
ECL_B056
ECL_B057
ECL_B058
ECL_B059
ECL_B060
ECL_B061
ECL_B062
ECL_B063
ECL_B064
ECL_B065
ECL_B066
ECL_B067
ECL_B068
ECL_B069
ECL_B070
ECL_B071
ECL_B072
ECL_B073
ECL_B074
ECL_B075
ECL_B076
ECL_B077
ECL_B078
ECL_B079
ECL_B080
ECL_B081
ECL_B082
ECL_B083
ECL_B084
ECL_B085
ECL_B086
ECL_B087
ECL_B088
ECL_B090
ECL_B091
ECL_B092
ECL_B093
ECL_B094
ECL_B095
ECL_B096
ECL_B097
ECL_B098
ECL_B099
ECL_B100
ECL_B101
ECL_B102
ECL_B103
ECL_B104
ECL_B105
ECL_B106
ECL_B107
ECL_B108
ECL_B109
ECL_B110
ECL_B111
ECL_B112
ECL_B113
ECL_B114
ECL_B115
ECL_B116
ECL_B117
ECL_B118
ECL_B119
ECL_B120
ECL_B121
ECL_B122
ECL_B123
ECL_B124
#Genomes: ALL_Enterobacter_cloacae_subsp_cloacae_ATCC_13047_chromosome_NC_014121,Enterobacter_cloacae_subsp_dissolvens_SDM_chromosome_NC_018079
ECL_00031,A3UG_00150
ECL_00032,A3UG_00155
ECL_00043,A3UG_00210
ECL_00059,A3UG_00300
ECL_00060,A3UG_00305
ECL_00062,A3UG_00310
ECL_00069,A3UG_00340
ECL_00070,A3UG_00345
ECL_00071,A3UG_00350
ECL_00072,A3UG_00355
ECL_00073,A3UG_00360
ECL_00074,A3UG_00365
ECL_00075,A3UG_00370
ECL_00076,A3UG_00375
ECL_00077,A3UG_00380
ECL_00078,A3UG_00385
ECL_00079,A3UG_00390
ECL_00089,A3UG_00455
ECL_00090,A3UG_00460
ECL_00091,A3UG_00465
ECL_00092,A3UG_00470
ECL_00093,A3UG_00475
ECL_00094,A3UG_00480
ECL_00095,A3UG_00485
ECL_00096,A3UG_00490
ECL_00097,A3UG_00495
ECL_00101,A3UG_00510
ECL_00103,A3UG_00525
ECL_00149,A3UG_00795
ECL_00180,A3UG_00930
ECL_00333,A3UG_01640
ECL_00370,A3UG_01805
ECL_00371,A3UG_01810
ECL_00373,A3UG_01825
ECL_00374,A3UG_01830
ECL_00375,A3UG_01835
ECL_00376,A3UG_01840
ECL_00377,A3UG_01845
ECL_00378,A3UG_01850
ECL_00380,A3UG_01865
ECL_00381,A3UG_01870
ECL_00382,A3UG_01875
ECL_00383,A3UG_01880
ECL_00384,A3UG_01885
ECL_00385,A3UG_01890
ECL_00386,A3UG_01895
ECL_00388,A3UG_01905
ECL_00526,A3UG_14835
ECL_00606,A3UG_02275
ECL_00608,A3UG_02280
ECL_00690,A3UG_00580
ECL_00692,A3UG_00570
ECL_01018,A3UG_04275
ECL_01019,A3UG_04280
ECL_01020,A3UG_04285
ECL_01021,A3UG_04290
ECL_01022,A3UG_04295
ECL_01025,A3UG_04300
ECL_01027,A3UG_04320
ECL_01028,A3UG_04325
ECL_01029,A3UG_04330
ECL_01030,A3UG_04335
ECL_01031,A3UG_04340
ECL_01032,A3UG_04345
ECL_01033,A3UG_04350
ECL_01034,A3UG_04355
ECL_01035,A3UG_04360
ECL_01036,A3UG_04365
ECL_01037,A3UG_04370
ECL_01038,A3UG_04375
ECL_01039,A3UG_04380
ECL_01040,A3UG_04385
ECL_01041,A3UG_04390
ECL_01042,A3UG_04400
ECL_01043,A3UG_04405
ECL_01044,A3UG_04410
ECL_01088,A3UG_04645
ECL_01091,A3UG_04665
ECL_01095,A3UG_04690
ECL_01098,A3UG_04705
ECL_01099,A3UG_04710
ECL_01100,A3UG_04715
ECL_01268,A3UG_05455
ECL_01361,A3UG_14325
ECL_01362,A3UG_14320
ECL_01363,A3UG_14315
ECL_01364,A3UG_14310
ECL_01365,A3UG_14305
ECL_01512,A3UG_13600
ECL_01522,A3UG_13550
ECL_01557,A3UG_13350
ECL_01574,A3UG_13285
ECL_01576,A3UG_13275
ECL_01577,A3UG_13270
ECL_01580,A3UG_13255
ECL_01582,A3UG_13245
ECL_01711,A3UG_10855
ECL_01712,A3UG_10865
ECL_01771,A3UG_12420
ECL_01772,A3UG_12415
ECL_01773,A3UG_12410
ECL_01774,A3UG_12405
ECL_01800,A3UG_12225
ECL_01831,A3UG_12170
ECL_01840,A3UG_12135
ECL_01882,A3UG_11930
ECL_01883,A3UG_11925
ECL_01959,A3UG_11440
ECL_01967,A3UG_11330
ECL_01980,A3UG_11265
ECL_01987,A3UG_11230
ECL_01995,A3UG_11190
ECL_01996,A3UG_11185
ECL_01997,A3UG_11180
ECL_01998,A3UG_11175
ECL_01999,A3UG_11170
ECL_02000,A3UG_11165
ECL_02001,A3UG_11160
ECL_02002,A3UG_11150
ECL_02044,A3UG_10955
ECL_02116,A3UG_10550
ECL_02117,A3UG_10540
ECL_02139,A3UG_10420
ECL_02155,A3UG_11605
ECL_02156,A3UG_10320
ECL_02173,A3UG_10240
ECL_02179,A3UG_10225
ECL_02180,A3UG_10220
ECL_02200,A3UG_10120
ECL_02279,A3UG_07815
ECL_02284,A3UG_07870
ECL_02285,A3UG_07865
ECL_02286,A3UG_07860
ECL_02293,A3UG_07840
ECL_02297,A3UG_07825
ECL_02496,A3UG_08800
ECL_02497,A3UG_08795
ECL_02724,A3UG_07650
ECL_03092,A3UG_06085
ECL_03144,A3UG_06835
ECL_03158,A3UG_05650
ECL_03172,A3UG_05585
ECL_03244,A3UG_14505
ECL_03259,A3UG_14575
ECL_03260,A3UG_14580
ECL_03261,A3UG_14585
ECL_03262,A3UG_14590
ECL_03263,A3UG_14595
ECL_03264,A3UG_14600
ECL_03265,A3UG_14605
ECL_03266,A3UG_14610
ECL_03267,A3UG_14615
ECL_03268,A3UG_14620
ECL_03269,A3UG_14625
ECL_03270,A3UG_14630
ECL_03271,A3UG_14635
ECL_03272,A3UG_14640
ECL_03273,A3UG_14645
ECL_03274,A3UG_14650
ECL_03275,A3UG_14655
ECL_03276,A3UG_14660
ECL_03277,A3UG_14665
ECL_03278,A3UG_14670
ECL_03279,A3UG_14675
ECL_03280,A3UG_14680
ECL_03281,A3UG_14685
ECL_03282,A3UG_14690
ECL_03283,A3UG_14695
ECL_03285,A3UG_14705
ECL_03286,A3UG_14710
ECL_03287,A3UG_14715
ECL_03288,A3UG_14720
ECL_03289,A3UG_14725
ECL_03291,A3UG_14730
ECL_03292,A3UG_14735
ECL_03293,A3UG_14740
ECL_03294,A3UG_14745
ECL_03295,A3UG_14750
ECL_03296,A3UG_14755
ECL_03297,A3UG_14760
ECL_03298,A3UG_14765
ECL_03299,A3UG_14770
ECL_03300,A3UG_14775
ECL_03301,A3UG_14780
ECL_03304,A3UG_14790
ECL_03305,A3UG_14795
ECL_03306,A3UG_14800
ECL_03307,A3UG_14805
ECL_03308,A3UG_14810
ECL_03309,A3UG_14815
ECL_03310,A3UG_14820
ECL_03311,A3UG_14825
ECL_03322,A3UG_14885
ECL_03482,A3UG_07830
ECL_03540,A3UG_10870
ECL_03572,A3UG_12550
ECL_03719,A3UG_16325
ECL_03790,A3UG_16695
ECL_03963,A3UG_17360
ECL_03964,A3UG_17365
ECL_03965,A3UG_17370
ECL_03966,A3UG_17380
ECL_03967,A3UG_17395
ECL_04078,A3UG_17930
ECL_04079,A3UG_17935
ECL_04187,A3UG_18520
ECL_04188,A3UG_18525
ECL_04189,A3UG_18530
ECL_04192,A3UG_10060
ECL_04217,A3UG_18595
ECL_04394,A3UG_19500
ECL_04444,A3UG_19665
ECL_04445,A3UG_19670
ECL_04446,A3UG_19675
ECL_04447,A3UG_19680
ECL_04448,A3UG_19685
ECL_04449,A3UG_19690
ECL_04450,A3UG_19695
ECL_04765,A3UG_21185
ECL_04798,A3UG_17450
ECL_05075,A3UG_22580
ECL_05083,A3UG_22620
ECL_05084,A3UG_22625
ECL_05085,A3UG_22630
ECL_05086,A3UG_22635
ECL_A004,A3UG_19065
ECL_A270,A3UG_18545
#Genomes: ALL_Enterobacter_cloacae_subsp_cloacae_ATCC_13047_chromosome_NC_014121,Enterobacter_cloacae_subsp_cloacae_ENHKU01
ECL_00338,ECENHK_01745
ECL_00629,ECENHK_02340
ECL_00654,ECENHK_02460
ECL_00729,ECENHK_08135
ECL_00730,ECENHK_08130
ECL_00920,ECENHK_04015
ECL_00921,ECENHK_04020
ECL_00922,ECENHK_04025
ECL_00923,ECENHK_04030
ECL_00924,ECENHK_04035
ECL_01202,ECENHK_05180
ECL_01327,ECENHK_11920
ECL_01328,ECENHK_11915
ECL_01329,ECENHK_11905
ECL_01330,ECENHK_11900
ECL_01337,ECENHK_11860
ECL_01338,ECENHK_11855
[truncated: 4,828 more rows]
